# Supplementary material for: Regulation of PERK–eIF2α signalling by tuberous sclerosis complex-1 controls homoeostasis and survival of myelinating oligodendrocytes
Source: PubMed Central journal article supplement (PMC4947172; doi:10.1038/ncomms12185), 2016-07-15
Supplement: ncomms12185-s1.pdf [file ncomms12185-s1.pdf]

**SUPPLEMENTARY INFORMATION**  
*Jiang et al.*

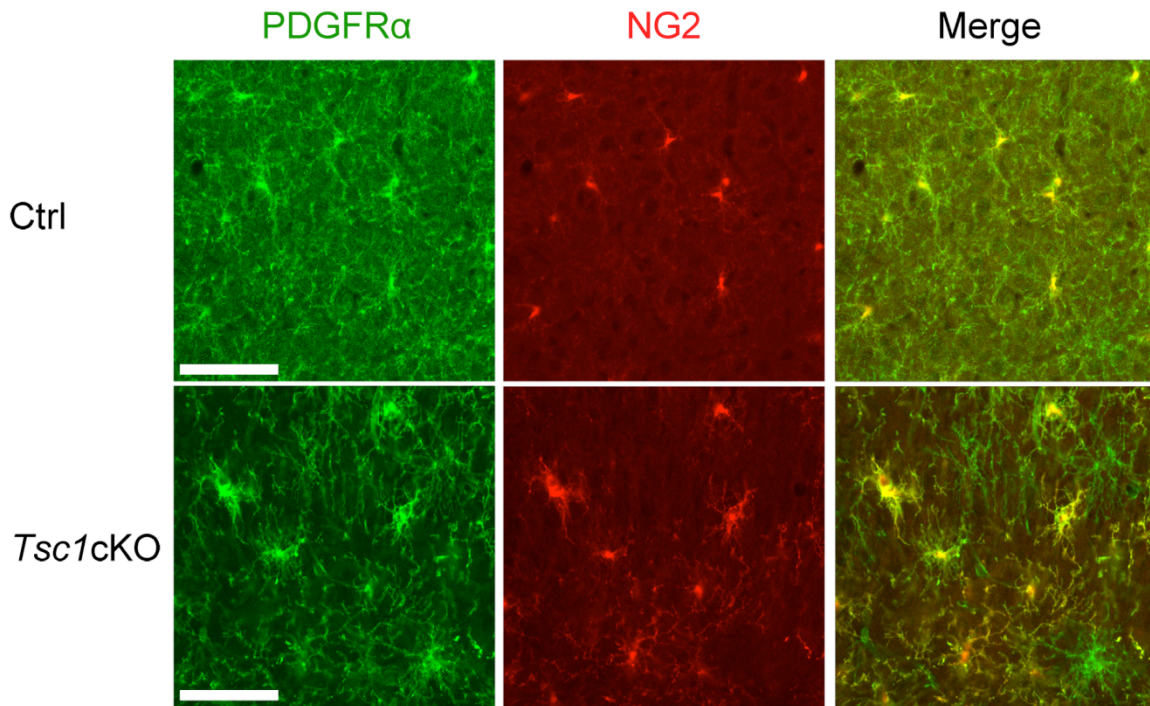

**Supplementary Figure 1. Enlarged NG2<sup>+</sup> and PDGFRα<sup>+</sup> cells in the *Tsc1cKO* cortex**

Immunofluorescent signals of PDGFRα (green) and NG2 (red) in the cortex of control and *Tsc1cKO* mutant at P14. Scale bars, 50 μm.

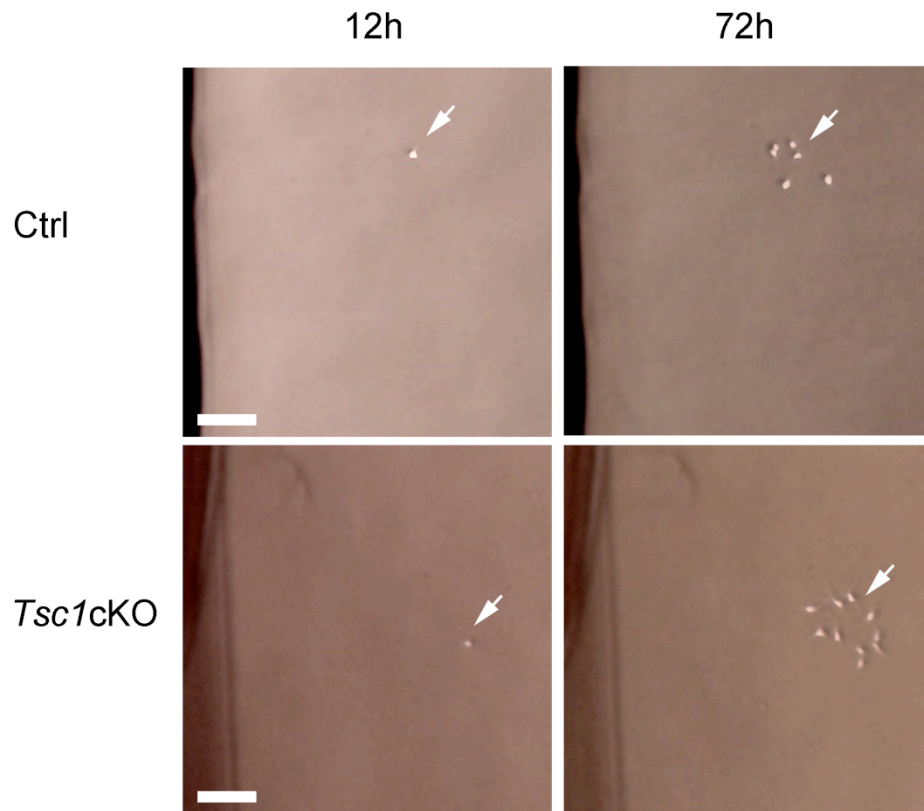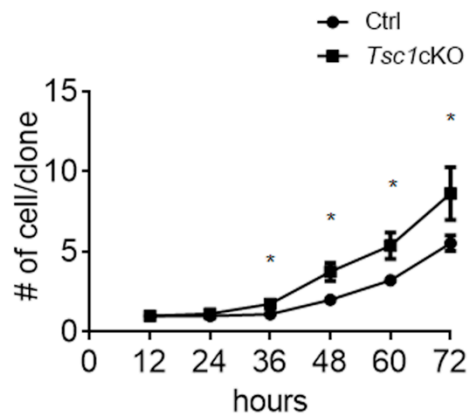

### Supplementary Figure 2. *Tsc1*-mutant OPCs exhibit enhanced cell growth

(a) OPCs isolated from the perinatal stage at P10 were cultured at the clonal density (1000 cells/ml/well) in the 12-well plate in the mitogen-containing growth medium. Representative images showing the growth of individual OPC from control and *Tsc1cKO* mutants at 12 and 72 h in culture.

(b) The number of control and *Tsc1cKO* OPCs under the growth condition over the course of time in the clonal assay. Data represent the mean  $\pm$  s.e.m. from 12 single cells/genotype. Scale bars, 50 $\mu$ m. \*  $P < 0.05$ , Student's *t* test

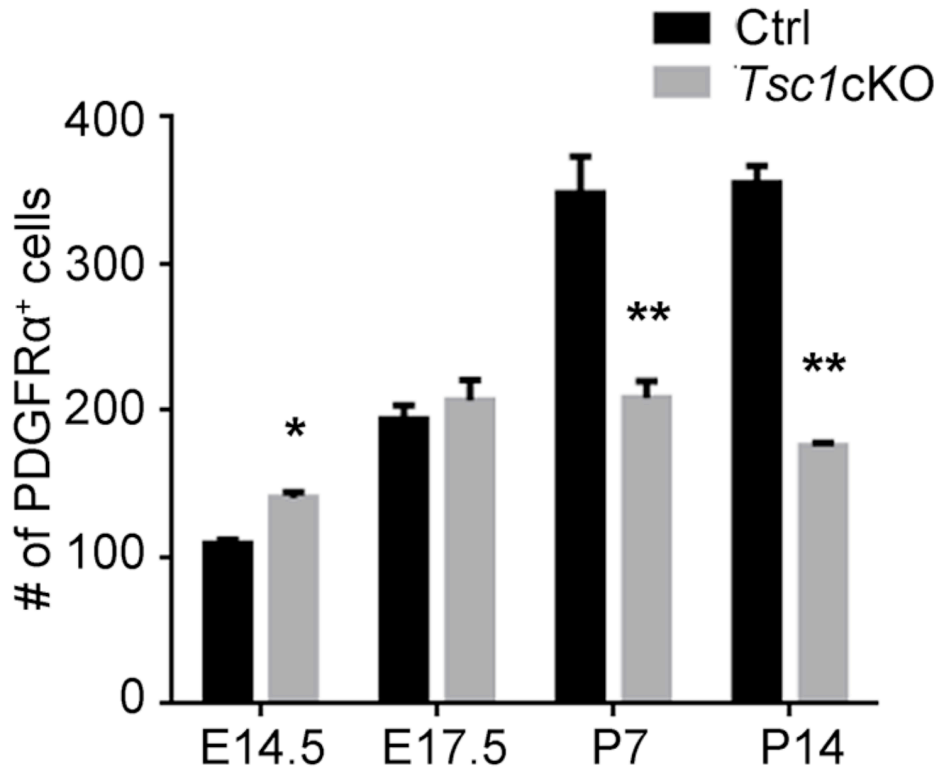

**Supplementary Figure 3. OPC development in the *Tsc1cKO* spinal cord**

Numbers of *PDGFR* $\alpha$ <sup>+</sup> cells in the spinal cord at the thoracic level in control and *Tsc1cKO* mutants at indicated stages by in situ hybridization. Data represent the mean  $\pm$  s.e.m. from three animals. \*  $P < 0.05$ , \*\*  $P < 0.01$ , Student's *t* test.

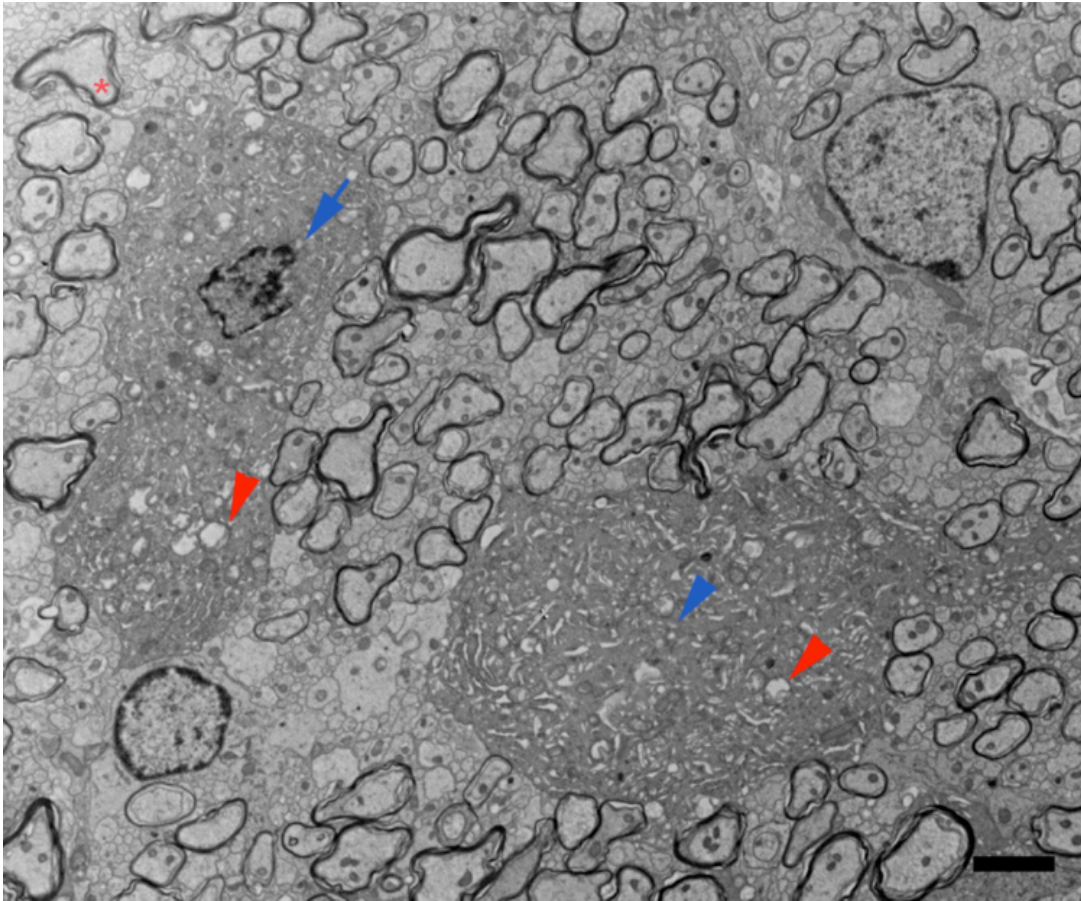

**Supplementary Figure 4. Vacuole features in dying oligodendrocytes in the spinal cord of *Tsc1*-mutant mice**

Representative EM image of dying OLs in *Tsc1*cKO mutant spinal cord at P14. Red arrowheads: vacuoles. Blue arrow and arrowhead: dying OLs with a shrunken nucleus and without a nucleus, respectively. Asterisk indicates a myelinating axon by a dying OL. Scale bar, 2  $\mu$ m.

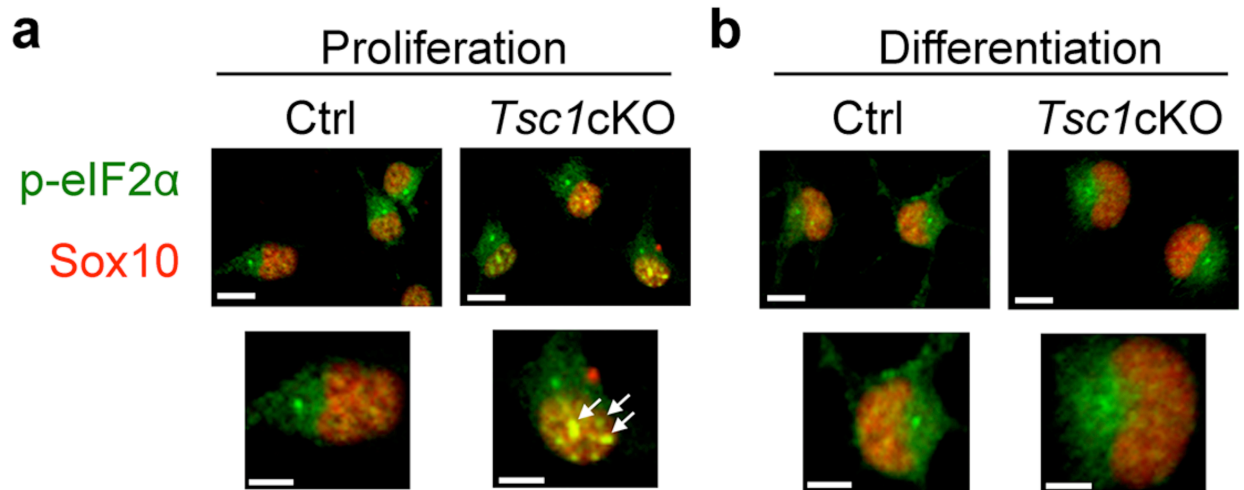

**Supplementary Figure 5. Attenuation of p-eIF2 $\alpha$  during the differentiation phase of *Tsc1*-mutant OPCs**

(a,b) Upper panels: primary OPCs from control and *Tsc1cKO* cultured (a) under proliferation conditions or (b) in T3-containing differentiation medium for 24 h immunostained for p-eIF2 $\alpha$  and Sox10, an OL lineage marker expressed in the nucleus. Scale bar, 10  $\mu$ m.

Lower panels: a high magnification view of an OPC from control and *Tsc1cKO* under proliferation and differentiation conditions, respectively. Arrows indicate the p-eIF2 $\alpha$  signal in the nucleus. Notably, the size of Sox10-labelled nuclei of mutant OPCs appeared larger in *Tsc1* mutants than controls under the differentiation condition. Scale bars, 3  $\mu$ m.

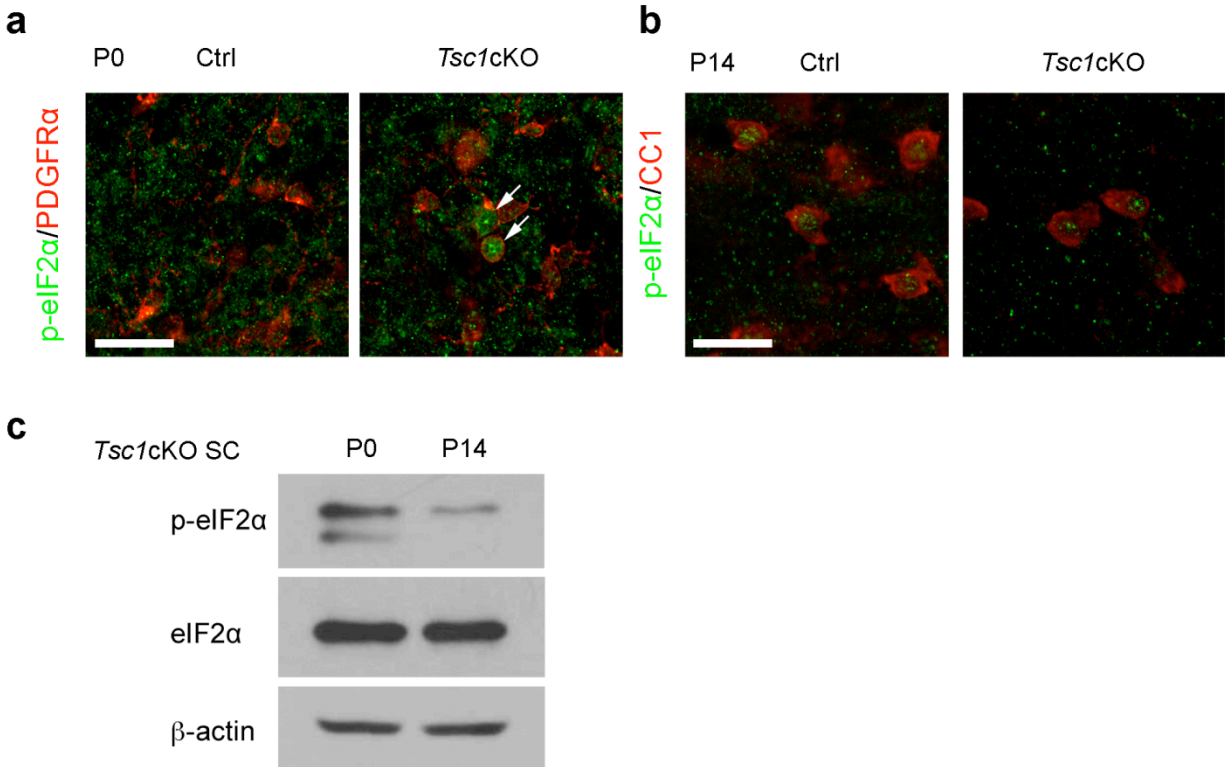

**Supplementary Figure 6. Elevation of p-eIF2 $\alpha$  in OPCs but not mature OLs in *Tsc1cKO* mice**

- (a) The corpus callosum of control and *Tsc1cKO* mice at P0 was immunostained with antibodies to PDGFR $\alpha$  and p-eIF2 $\alpha$ . Scale bar, 25  $\mu$ m.
- (b) The corpus callosum of control and *Tsc1cKO* mice at P14 was immunostained with antibodies to CC1 and p-eIF2 $\alpha$ . Scale bar, 25  $\mu$ m.
- (c) Representative western blot for p-eIF2 $\alpha$  and eIF2 $\alpha$  expression using spinal cord (SC) extracts of *Tsc1cKO* animals at P0 and P14.  $\beta$ -actin was used as a loading control.

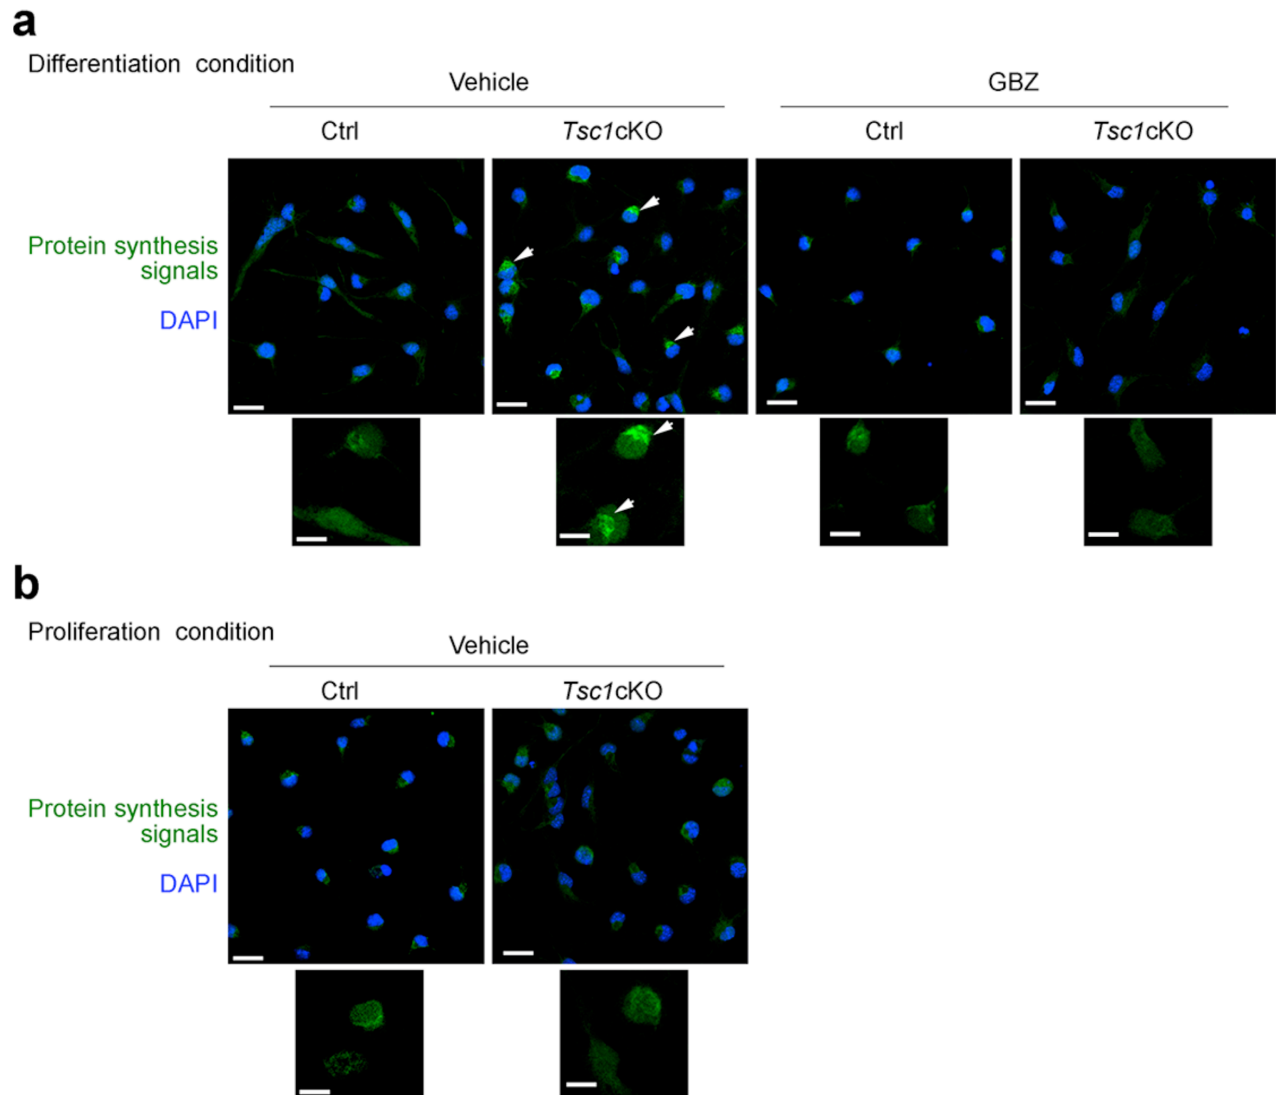

**Supplementary Figure 7. Constitutive activating mTOR signaling elevates protein synthesis**

**(a,b)** Upper panels: primary OPCs from control and *Tsc1cKO* were cultured under T3-containing differentiation medium for 24 h and treated with vehicle and guanabenz for 24 h **(a)** or under PDGFAA-containing proliferation medium with vehicle **(b)**. Newly synthesized proteins were detected by Click-iT® HPG Alexa Fluor® 488 Protein Synthesis Assay Kit. Arrows indicate the signals of protein translation. Lower panels are shown at a high magnification. Scale bars in upper and lower panels in **a** and **b** are 10 and 3  $\mu$ m, respectively.

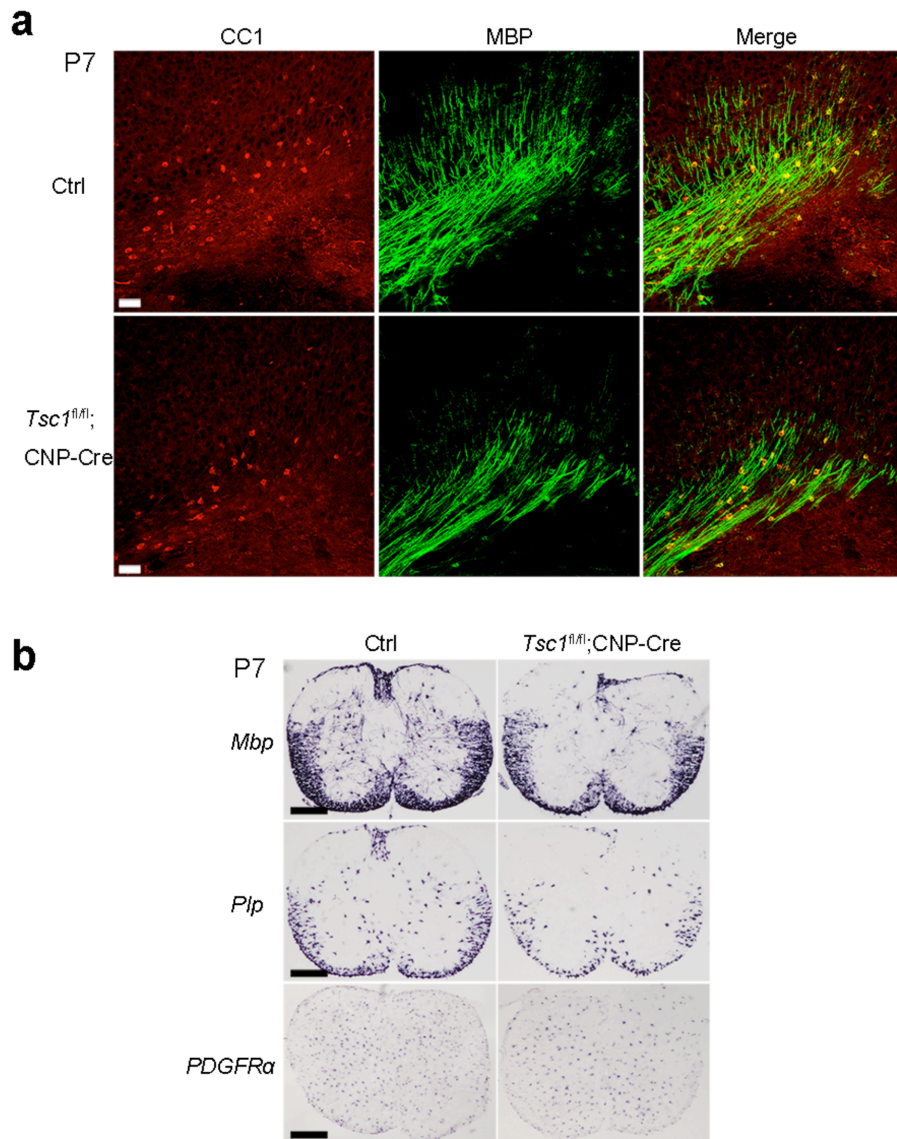

**Supplementary Figure 8. Myelination deficiency in the CNS of *Tsc1* mutants in *CNP*-expressing cells**

(a) The cortices of control and *Tsc1<sup>fl/fl</sup>*;CNP-Cre<sup>+/-</sup> mutant were immunostained with antibodies to CC1 and MBP at P7. Scale bars, 50  $\mu$ m.

(b) In situ hybridization to detect *MBP*, *Plp1*, and *PDGFR $\alpha$*  in spinal cords of control and *Tsc1<sup>fl/fl</sup>*;CNP-Cre<sup>+/-</sup> mutant at P7. Scale bars, 100  $\mu$ m



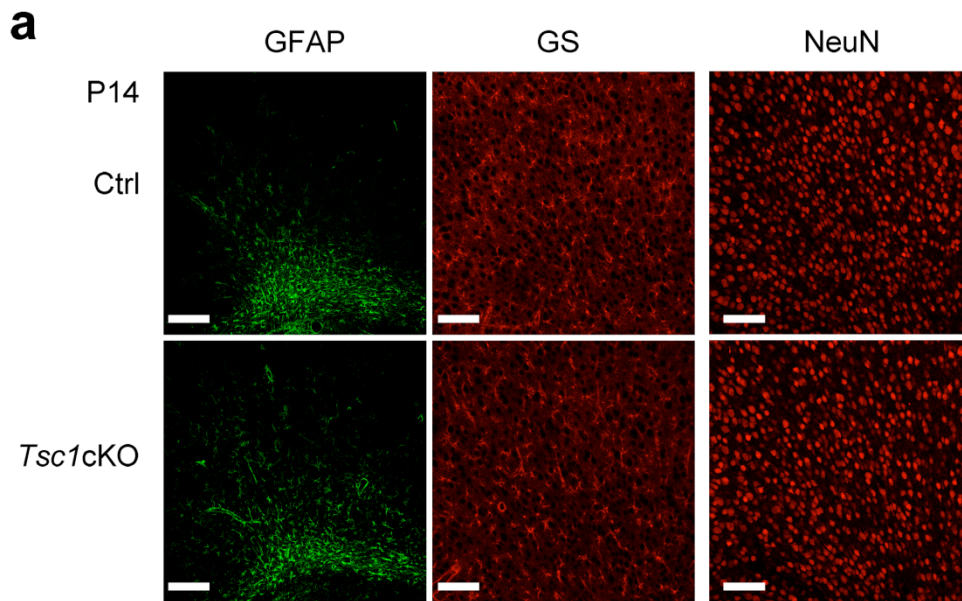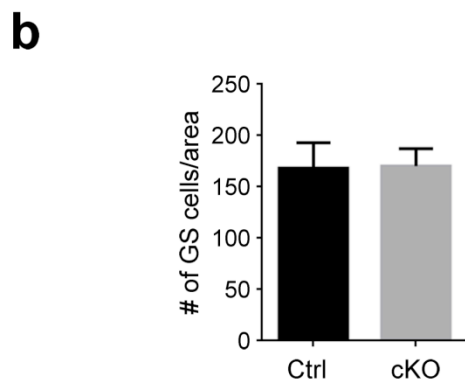

**Supplementary Figure 9. Normal neuronal and astrocyte development in *Tsc1*cKO mice**

(a) Images showing the cortices of control and *Tsc1*cKO mutants immunostained with antibodies to GFAP, GS and NeuN. Scale bars, 50  $\mu$ m.

(b) Quantification of GS<sup>+</sup> cells in the cortex (0.4 mm<sup>2</sup>) in control and *Tsc1*cKO mice at P14. Data represent the mean  $\pm$  s.e.m. from three animals.

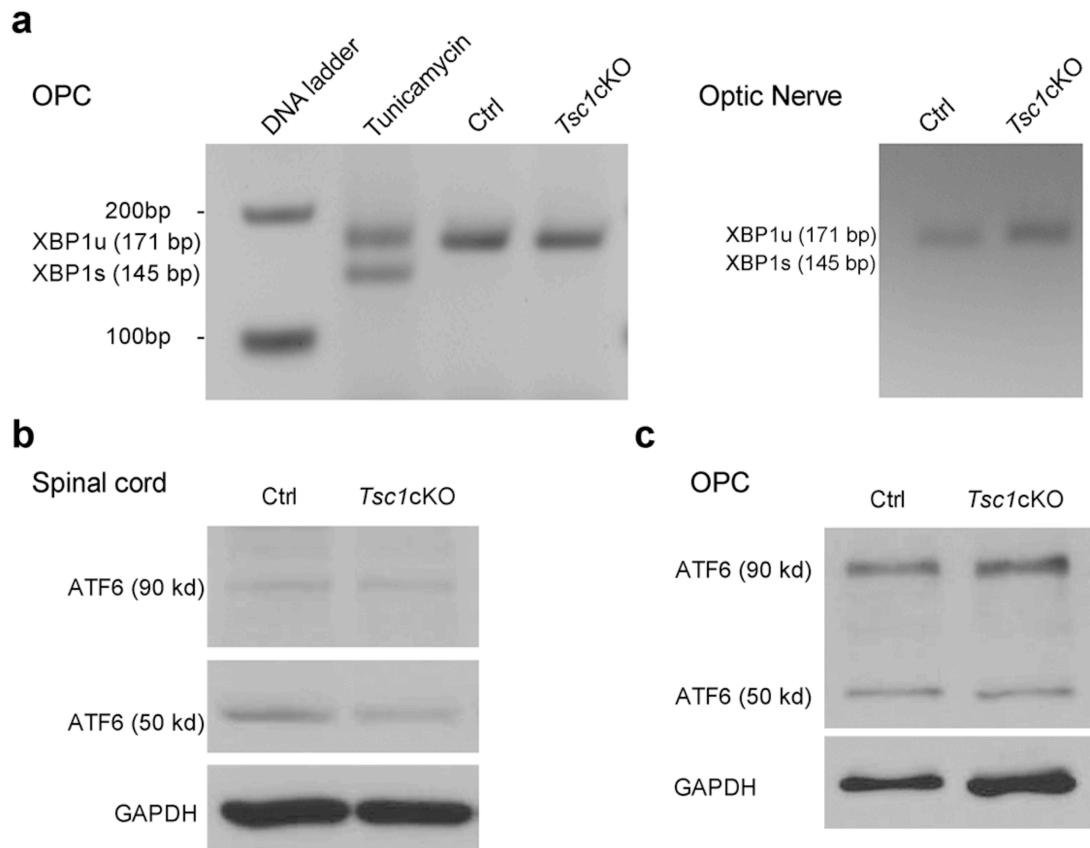

**Supplementary Figure 10. *Tsc1* ablation induces ER stress independent of XBP-1 and ATF6**

(a) PCR analysis of spliced forms of *XBP-1* in OPCs (left panel) under differentiation conditions or optic nerves (right panel) from controls and *Tsc1* mutants at P12. Tunicamycin (2  $\mu$ g/ml) treated control OPCs were used as positive control.

(b) Western blot for ATF6 using spinal cords of control and *Tsc1*cKO animals at P14. GAPDH was used as a loading control.

(c) Western blot for ATF6 expression in OPCs isolated from control and *Tsc1*cKO mutants at P5. GAPDH was used as a loading control.

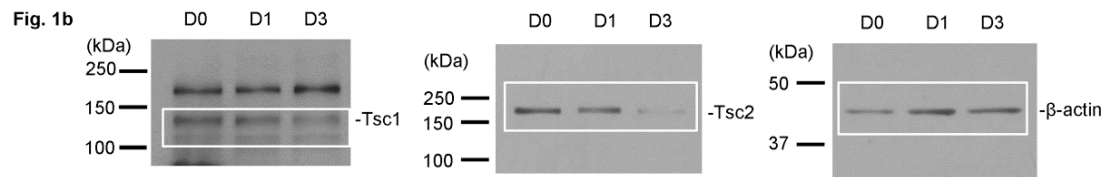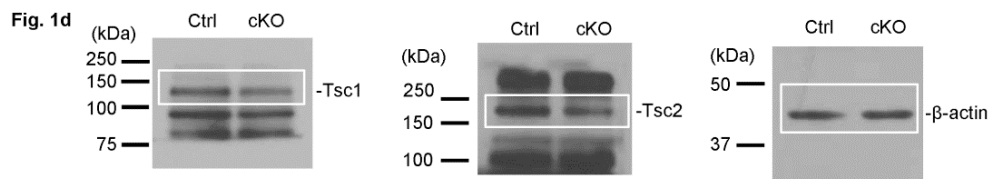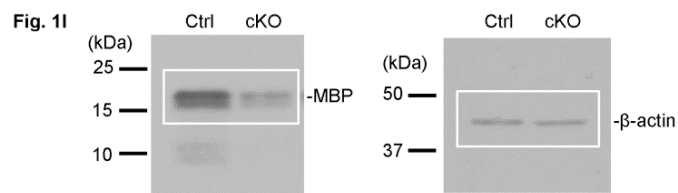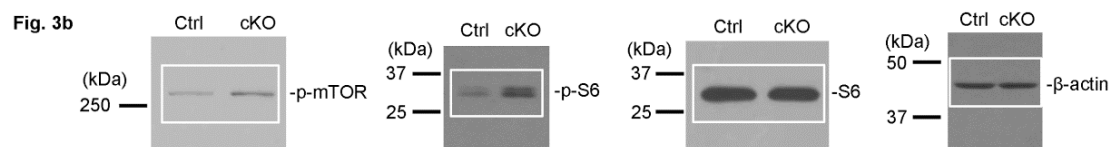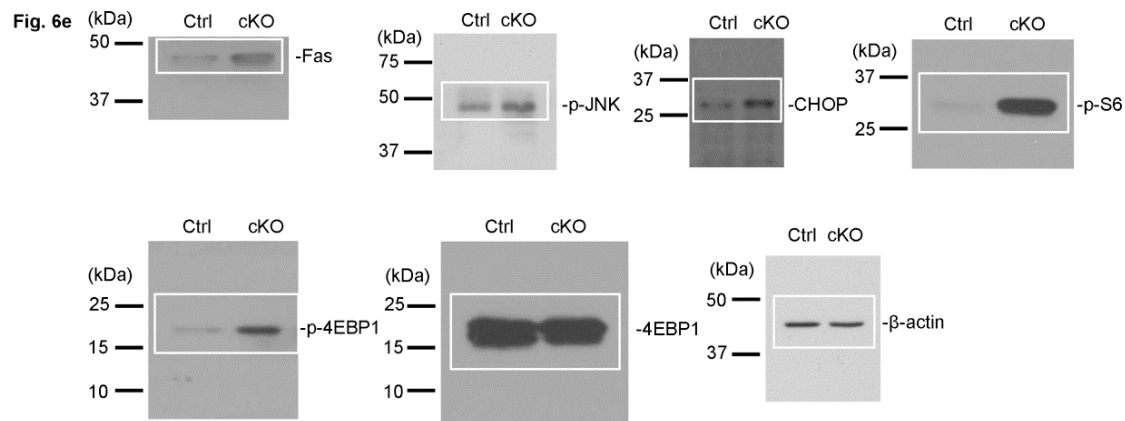

**Supplementary Figure 11. Full-scanned images of western blots in the main Figures**

Fig. 1b showing the western blots of Tsc1, Tsc2 and  $\beta$ -actin in rat OPCs after T3-treatment for 0, 1 and 3 days.

Fig. 1d showing the western blots of Tsc1, Tsc2 and  $\beta$ -actin in control and *Tsc1*cKO mutants.

Fig. 1i showing the western blots of p-mTOR, p-S6, S6 and  $\beta$ -actin in control and *Tsc1*cKO mutants.

Fig. 6e showing the western blots of Fas, p-JNK, CHOP, p-S6, p-4EBP1, 4EBP1 and  $\beta$ -actin.

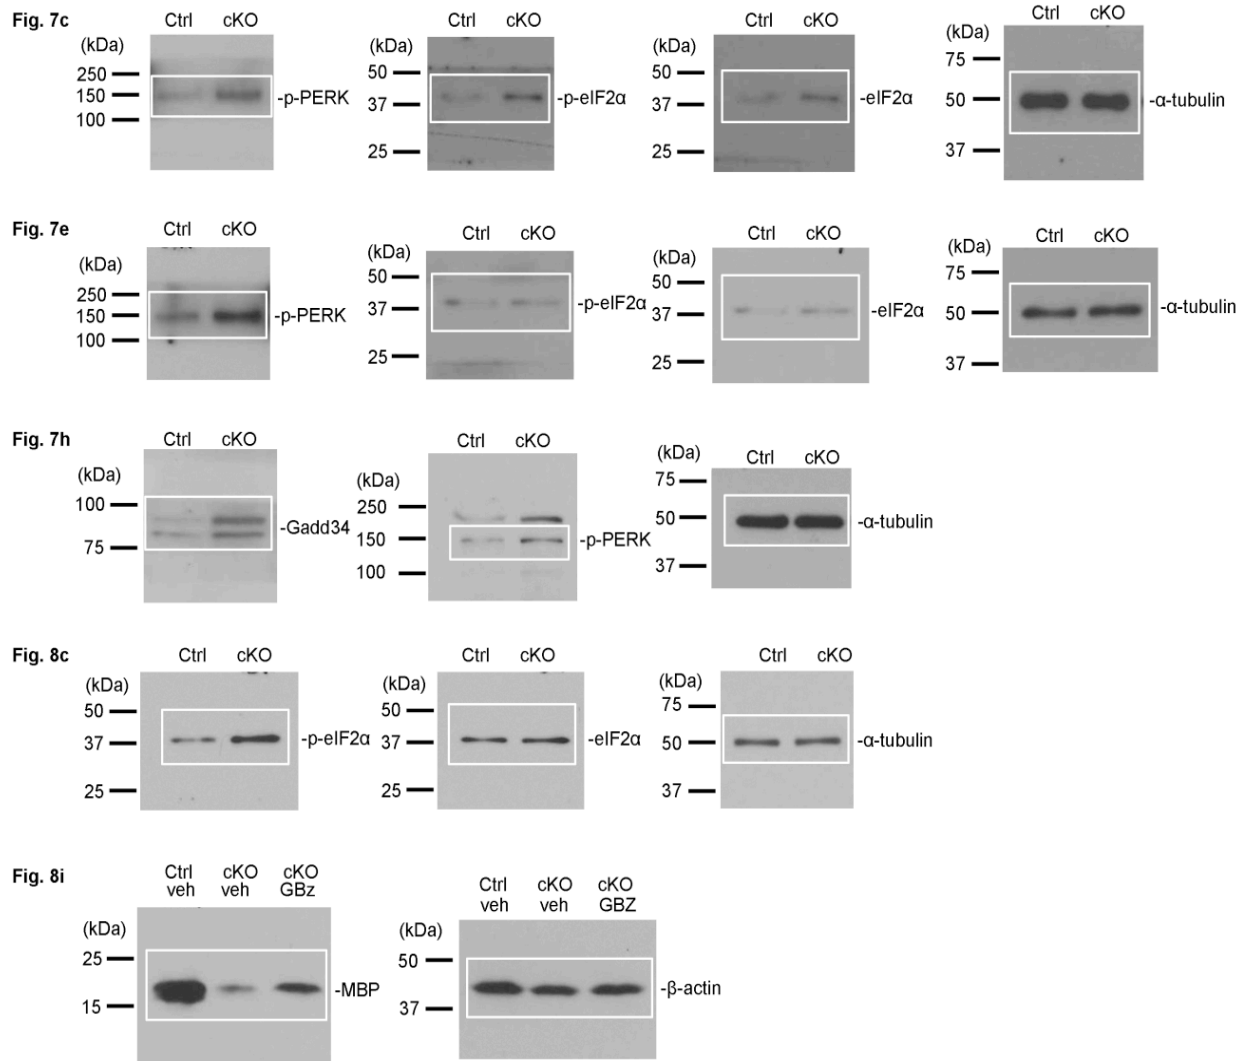

**Supplementary Figure 12. Full-scanned images of western blots in the main Figures**

Fig. 7c showing the western blots of p-PERK, p-eIF2 $\alpha$ , eIF2 $\alpha$  and  $\alpha$ -tubulin blot under PDGFAA containing proliferation medium.

Fig. 7e showing the western blots of p-PERK, p-eIF2 $\alpha$ , eIF2 $\alpha$  and  $\alpha$ -tubulin blot under T3-containing differentiation medium.

Fig. 7h showing the western blots of Gadd34, p-PERK and  $\alpha$ -tubulin.

Fig. 8c showing the western blots of p-eIF2 $\alpha$ , eIF2 $\alpha$  and  $\alpha$ -tubulin.

Fig. 8i showing the western blots of MBP and  $\beta$ -actin in control and *Tsc1*cKO mice treated with vehicle or guanabenz.

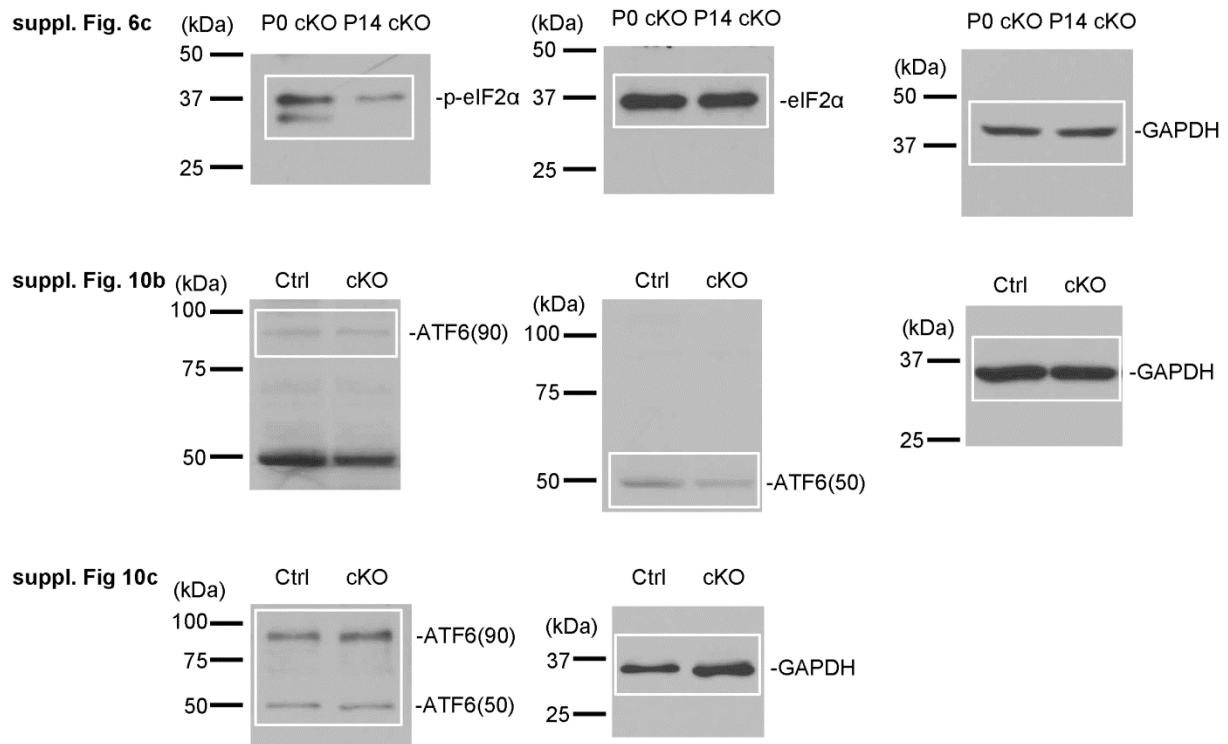

**Supplementary Figure 13. Full-scanned images of western blots in the Supplementary Figures**

Suppl. Fig. 6c showing the western blots of p-eIF2 $\alpha$ , eIF2 $\alpha$  and GAPDH.

Suppl. Fig. 10b showing the western blots of ATF6 and GAPDH.

Suppl. Fig. 10c showing the western blots of ATF6 and GAPDH.
